# Supplementary material
Source: MDPI journal article supplement (https://www.mdpi.com/2072-4292/15/6/1482)
Supplement: s1 [file s1]

## Supplementary Material

Table S1. Coefficient (slope) values for all control samples using the linear broken stick model. The break was at 100% moisture content for the fabric mesh and 40% moisture content for the pine board samples. Coefficients that varied significantly from the coefficients of 0° are bolded, with level of significance denoted by number of \*.

| Sample | Moisture | FARO 0°   | RIEGL 0°  | FARO 45°          | RIEGL 45° | FARO 90°           | RIEGL 90°          |
|--------|----------|-----------|-----------|-------------------|-----------|--------------------|--------------------|
| FM 3M  | <100%    | -0.000464 | -0.000580 | -0.000410         | -0.000513 | -0.000434          | -0.000517          |
|        | >100%    | -0.000153 | -0.000207 | -0.000164         | -0.000189 | -0.000161          | <b>-0.000180*</b>  |
| FM 6M  | <100%    | -0.000557 | -0.000608 | -0.000544         | -0.000555 | <b>-0.000502*</b>  | -0.000519          |
|        | >100%    | -0.000086 | -0.000158 | -0.000130         | -0.000169 | <b>-0.000132**</b> | <b>-0.000164**</b> |
| FM 9M  | <100%    | -0.000628 | -0.000698 | -0.000545         | -0.000595 | -0.000509          | -0.000565          |
|        | >100%    | 0.000023  | -0.000165 | -0.000048         | -0.000181 | <b>-0.000062*</b>  | <b>-0.000172*</b>  |
| FM 12M | <100%    | -0.000609 | -0.000638 | -0.000545         | -0.000576 | -0.000493          | -0.000542          |
|        | >100%    | -0.000022 | -0.000157 | -0.000115         | -0.000184 | -0.000109          | <b>-0.000175*</b>  |
| PB 3M  | <40%     | -0.000906 | -0.000547 | -0.000733         | -0.000443 | -0.000727          | -0.000470          |
|        | >40%     | -0.003306 | -0.003258 | <b>-0.003135*</b> | -0.003014 | -0.003170          | -0.002551          |
| PB 6M  | <40%     | -0.000649 | -0.000375 | -0.000736         | -0.000495 | -0.000596          | -0.000436          |
|        | >40%     | -0.003522 | -0.003263 | -0.003071         | -0.002908 | <b>-0.003883**</b> | <b>-0.003548*</b>  |
| PB 9M  | <40%     | -0.001110 | -0.000468 | -0.001155         | -0.000571 | -0.000801          | -0.000288          |
|        | >40%     | -0.003409 | -0.003337 | -0.003388         | -0.003330 | <b>-0.003370**</b> | <b>-0.003665**</b> |
| PB 12M | <40%     | -0.001111 | -0.000407 | -0.001102         | -0.000537 | -0.000855          | <b>-0.000342*</b>  |
|        | >40%     | -0.001716 | -0.002437 | -0.001739         | -0.002306 | <b>-0.002567**</b> | <b>-0.002776**</b> |

Table S2. A comprehensive table of the coefficients and R<sup>2</sup> values for the non-normalized data.

| Distance | Scanner | Moisture Content | Intensity      | DF       | PP       | LLP      | SRO      | FM 0     | FM 45    | FM 90    | PB 0°    | PB 45°   | PB 90°   |
|----------|---------|------------------|----------------|----------|----------|----------|----------|----------|----------|----------|----------|----------|----------|
| ALL      | FARO    | < 100%           | Mean           | -328.04  | 121.897  | 29.99583 | -190.408 | -68.0624 | -69.9728 | -159.384 | -35.4124 | -65.7588 | 219.5456 |
|          |         |                  | SD             | 9683.698 | 1745.224 | 1726.546 | 4527.125 | 4666.219 | 4790.478 | 4481.968 | 137.1439 | 485.7037 | 684.8512 |
|          |         |                  | R <sup>2</sup> | 0.2968   | 0.07787  | 0.03368  | 0.3939   | 0.5646   | 0.5785   | 0.6744   | 0.2761   | 0.08249  | 0.179    |
|          |         | >100%            | Mean           | -226.853 | -166.625 | -227.312 | -476.774 | -205.586 | -397.64  | -864.387 | -18.858  | -27.9871 | -64.317  |
|          |         |                  | SD             | 2517.893 | 339.8042 | 487.424  | -1214.55 | 1654.981 | 6068.273 | 6165.594 | 321.785  | 275.6903 | 231.696  |
|          |         |                  | R <sup>2</sup> | 0.2488   | 0.1454   | 0.1545   | 0.3904   | 0.01365  | 0.328    | 0.419    | 0.4251   | 0.4344   | 0.4466   |
|          | RIEGL   | < 100%           | Mean           | -1482.1  | -146.65  | -485.4   | -1181    | -1001    | -775.64  | -362.525 | -83.965  | -194.285 | -81.53   |
|          |         |                  | SD             | 8969.6   | 444.35   | -43.06   | 1885.7   | 1508.35  | 3225.215 | 4534.335 | 330.445  | 1118.495 | 777.17   |
|          |         |                  | R <sup>2</sup> | 0.4424   | 0.2287   | 0.03945  | 0.3237   | 0.7867   | 0.784    | 0.7576   | 0.03519  | 0.1675   | 0.09777  |
|          |         | >100%            | Mean           | -595.305 | -537.35  | -557.57  | -1156.85 | -2745.5  | -2669.2  | -1709.1  | -32.1    | -41.3765 | -43.06   |
|          |         |                  | SD             | 1921.575 | -297.65  | -146.75  | 101.51   | 3279.5   | 4817.8   | 5075.1   | 360.36   | 318.1845 | 301.295  |
|          |         |                  | R <sup>2</sup> | 0.5995   | 0.5743   | 0.5605   | 0.7887   | 0.4777   | 0.6476   | 0.5165   | 0.4546   | 0.4797   | 0.4241   |
| 3M       | FARO    | < 100%           | Mean           | -1419.31 | 177.537  | 165.2163 | -337.969 | -372.605 | -110.592 | -170.328 | -240.681 | -261.063 | -178.749 |
|          |         |                  | SD             | 14743.37 | 4797.235 | 9433.907 | 6387.827 | 5138.907 | 4998.693 | 4803.265 | 1122.533 | 922.3864 | 508.3628 |
|          |         |                  | R <sup>2</sup> | 0.7544   | 0.2556   | 0.5304   | 0.8111   | 0.7414   | 0.5703   | 0.656    | 0.1703   | 0.2145   | 0.0994   |
|          |         | >100%            | Mean           | -816.022 | -549.945 | -740.524 | -1171.46 | -2316.37 | -2342.58 | -2357.99 | -316.867 | -60.7519 | -57.3145 |
|          |         |                  | SD             | 2062.057 | 546.9962 | -1534.26 | -296.419 | 6075.187 | 6979.584 | 7215.514 | 272.4921 | 239.7635 | 253.7587 |
|          |         |                  | R <sup>2</sup> | 0.6844   | 0.4953   | 0.5866   | 0.7819   | 0.3872   | 0.6764   | 0.7345   | 0.4319   | 0.4736   | 0.4426   |
|          | RIEGL   | < 100%           | Mean           | -3390.55 | -204.05  | 7441.3   | -1419.9  | -1368.7  | -1284.95 | -1426.35 | -185.6   | -406.7   | -259.65  |
|          |         |                  | SD             | 5222.2   | 3120.15  | 7651.1   | 5392.05  | 1084.3   | 1977.7   | 1380.35  | 845.45   | 1894.15  | 1406.35  |
|          |         |                  | R <sup>2</sup> | 0.798    | 0.1274   | 0.3581   | 0.7817   | 0.9076   | 0.8687   | 0.906    | 0.0778   | 0.2531   | 0.1245   |
|          |         | >100%            | Mean           | -901.6   | -776.9   | -825.55  | -1287    | -3649.9  | -3746.65 | -3811.67 | -42.005  | -63.685  | -55.06   |
|          |         |                  | SD             | 1890.8   | -1356.15 | -1431.95 | -642.45  | 4701     | 4439.85  | 4337.25  | 316.19   | 301.46   | 359.635  |
|          |         |                  | R <sup>2</sup> | 0.7797   | 0.7731   | 0.7575   | 0.877    | 0.7644   | 0.8346   | 0.8594   | 0.458    | 0.5231   | 0.4917   |
| 6M       | FARO    | < 100%           | Mean           | -667.288 | 67.86253 | -465.338 | -411.959 | -354.976 | -236.323 | -428.311 | -187.498 | -324.567 | -274.235 |
|          |         |                  | SD             | 14022.05 | 1679.36  | 3923.608 | 4823.613 | 4279.632 | 4229.792 | 3911.811 | 725.7457 | 1348.272 | 859.4391 |
|          |         |                  | R <sup>2</sup> | 0.508    | 0.05564  | 0.1344   | 0.5169   | 0.8106   | 0.6948   | 0.8232   | 0.09245  | 0.3064   | 0.2087   |
|          |         | >100%            | Mean           | -687.505 | -504.889 | -622.264 | -1003.88 | -1657.41 | -2240.02 | -2865.56 | -34.7275 | -52.2486 | -80.4782 |
|          |         |                  | SD             | 953.9748 | -470.057 | -989.626 | -366.674 | 4842.783 | 6412.698 | 6039.142 | 328.0404 | 306.2923 | 265.9779 |
|          |         |                  | R <sup>2</sup> | 0.5231   | 0.4723   | 0.5205   | 0.7381   | 0.1843   | 0.592    | 0.7069   | 0.5401   | 0.5609   | 0.5887   |
|          | RIEGL   | < 100%           | Mean           | -2563.45 | -138.05  | -747     | -1744.3  | -1180.35 | -1007.45 | -1102.1  | -168.4   | -282.65  | -252.95  |
|          |         |                  | SD             | 10253.65 | 1034.75  | 1626.5   | 3590     | 1598.7   | 2581.6   | 2320.7   | 784.9    | 1410.65  | 1146     |
|          |         |                  | R <sup>2</sup> | 0.6858   | 0.03539  | 0.1171   | 0.5534   | 0.925    | 0.8919   | 0.8908   | 0.04901  | 0.2155   | 0.1836   |
|          |         | >100%            | Mean           | -665.25  | -655.4   | -763.7   | -1202.35 | -3088.5  | -3358.3  | -3757.85 | -45.205  | -52.555  | -84.495  |
|          |         |                  | SD             | 1255.4   | -961.95  | -1231.2  | -166.1   | 4613     | 5382.65  | 4335.65  | 381.54   | 336.855  | 321.83   |
|          |         |                  | R <sup>2</sup> | 0.6365   | 0.6653   | 0.7048   | 0.8325   | 0.5157   | 0.7892   | 0.8282   | 0.559    | 0.5322   | 0.5931   |
| 9M       | FARO    | < 100%           | Mean           | -345.833 | 490.8646 | -50.6921 | -409.928 | -10.4464 | 20.73887 | 52.10112 | -104.33  | -132.874 | -190.546 |
|          |         |                  | SD             | 7636.943 | 2325.217 | 640.8438 | 4211.999 | 4957.798 | 5527.962 | 5322.473 | 599.022  | 722.8621 | 738.263  |
|          |         |                  | R <sup>2</sup> | 0.2048   | 0.09837  | 0.009978 | 0.3417   | 0.5598   | 0.6588   | 0.1015   | 0.1621   | 0.1657   | 0.2007   |
|          |         | >100%            | Mean           | -119.341 | -215.843 | -437.708 | -1008.76 | 214.9908 | -578.028 | -749.404 | -172.36  | -38.6662 | -72.1224 |
|          |         |                  | SD             | 2104.001 | 68.97664 | -222.102 | 1250.918 | -296.092 | 6398.542 | 5283.185 | 369.5575 | 286.7528 | 204.8    |
|          |         |                  | R <sup>2</sup> | 0.1366   | 0.1239   | 0.2259   | 0.5474   | -0.02204 | 0.3258   | 0.2996   | 0.4879   | 0.5093   | 0.426    |
|          | RIEGL   | < 100%           | Mean           | 62.7     | 187.7    | -704.5   | -1468.6  | -1160.05 | -2518.9  | -1121.5  | -185.95  | -214.685 | -417.25  |
|          |         |                  | SD             | 16086.2  | 1173.3   | -412.25  | 3703.55  | 467.15   | 6701.4   | 1672.1   | 884.25   | 1317.53  | 1300.15  |
|          |         |                  | R <sup>2</sup> | 0.3354   | 0.004904 | 0.02348  | 0.3944   | 0.8527   | 0.645    | 0.829    | 0.07544  | 0.2004   | 0.2837   |
|          |         | >100%            | Mean           | -640.4   | -623.45  | -715.95  | -1150.45 | -3216.55 | -3356    | -3730.15 | -29.57   | -44.005  | -83.35   |
|          |         |                  | SD             | 468.35   | -1016.8  | -919.85  | -110.7   | 3975.85  | 5185     | 4320.1   | 397.485  | 323.915  | 197.01   |
|          |         |                  | R <sup>2</sup> | 0.6647   | 0.6093   | 0.7434   | 0.8205   | 0.5285   | 0.7729   | 0.8196   | 0.4864   | 0.5027   | 0.4415   |
| 12M      | FARO    | < 100%           | Mean           | -227.574 | 330.3014 | 12.22574 | -197.755 | -171.803 | -51.5768 | -32.0799 | -58.5433 | -122.946 | -188.58  |
|          |         |                  | SD             | 6751.027 | 1829.11  | -288.234 | 2615.837 | 3165.618 | 5062.263 | 5510.726 | 237.5287 | 847.0528 | 663.5848 |
|          |         |                  | R <sup>2</sup> | 0.1452   | 0.07803  | 0.00146  | 0.1662   | 0.3025   | 0.5128   | 0.6545   | 0.04119  | 0.162    | 0.1779   |
|          |         | >100%            | Mean           | 12.77624 | -108.298 | -358.908 | -903.774 | -168.002 | -929.595 | -827.49  | -9.73537 | -19.8738 | -64.1794 |
|          |         |                  | SD             | 3522.56  | 407.8305 | -348.258 | 781.6151 | 343.212  | 5987.238 | 5437.26  | 340.6037 | 257.2124 | 210.4492 |
|          |         |                  | R <sup>2</sup> | 0.2153   | 0.06623  | 0.159    | 0.5263   | 0.003819 | 0.3821   | 0.3579   | 0.2815   | 0.3296   | 0.3628   |
|          | RIEGL   | < 100%           | Mean           | -3019    | -3.24    | -481.75  | -1272    | -1274.3  | -1085.15 | -1232.65 | -124.05  | -209.225 | -578.85  |
|          |         |                  | SD             | 7687.5   | 509.365  | -281.6   | 647.05   | 966.95   | 2449.85  | 1708.8   | 524.95   | 1345.46  | 1273.8   |
|          |         |                  | R <sup>2</sup> | 0.5518   | 0.01399  | 0.00388  | 0.19     | 0.8831   | 0.8381   | 0.8492   | 0.02969  | 0.1826   | 0.3304   |
|          |         | >100%            | Mean           | -738     | -600.6   | -597.05  | -1140.7  | -3379.1  | -3468.95 | -3815.4  | -22.13   | -26.655  | -65.28   |
|          |         |                  | SD             | 312.75   | -779.55  | -719.6   | -499.2   | 2577.1   | 5150.2   | 4027.5   | 357.935  | 302.87   | 232.7    |
|          |         |                  | R <sup>2</sup> | 0.728    | 0.5829   | 0.7502   | 0.8099   | 0.4946   | 0.7935   | 0.8226   | 0.3176   | 0.3805   | 0.4197   |

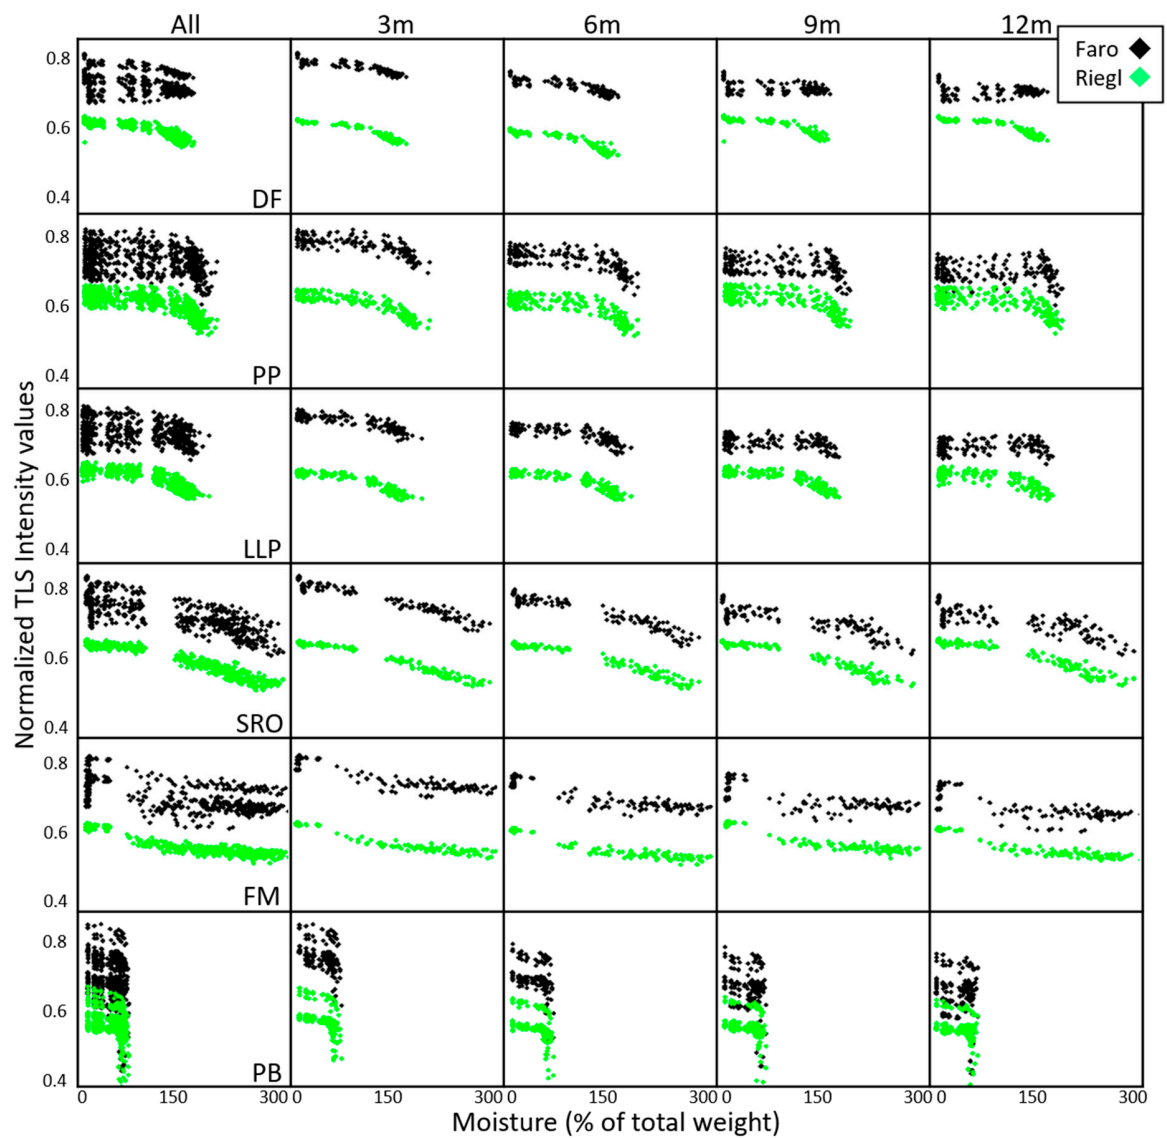

Figure S1. Mean intensity values of all samples across all distances. There was more variability in the intensity returns at different distances with the FARO PS compared to the RIEGL TOF.

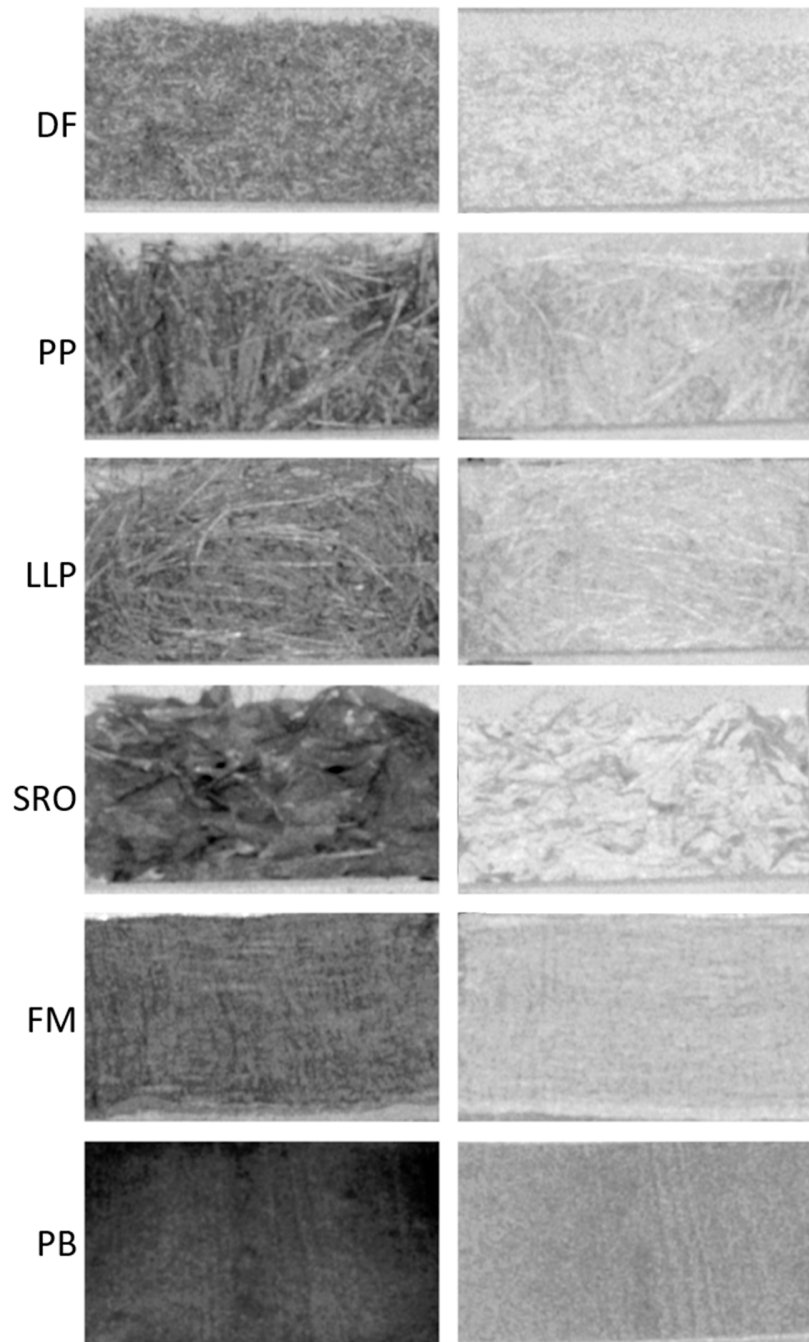

Figure S2. Images produced from the FARO laser scanner of a representative of each sample type fully saturated and after having been oven dried. Samples reflected more energy when dry and were more homogenous in reflectance values.

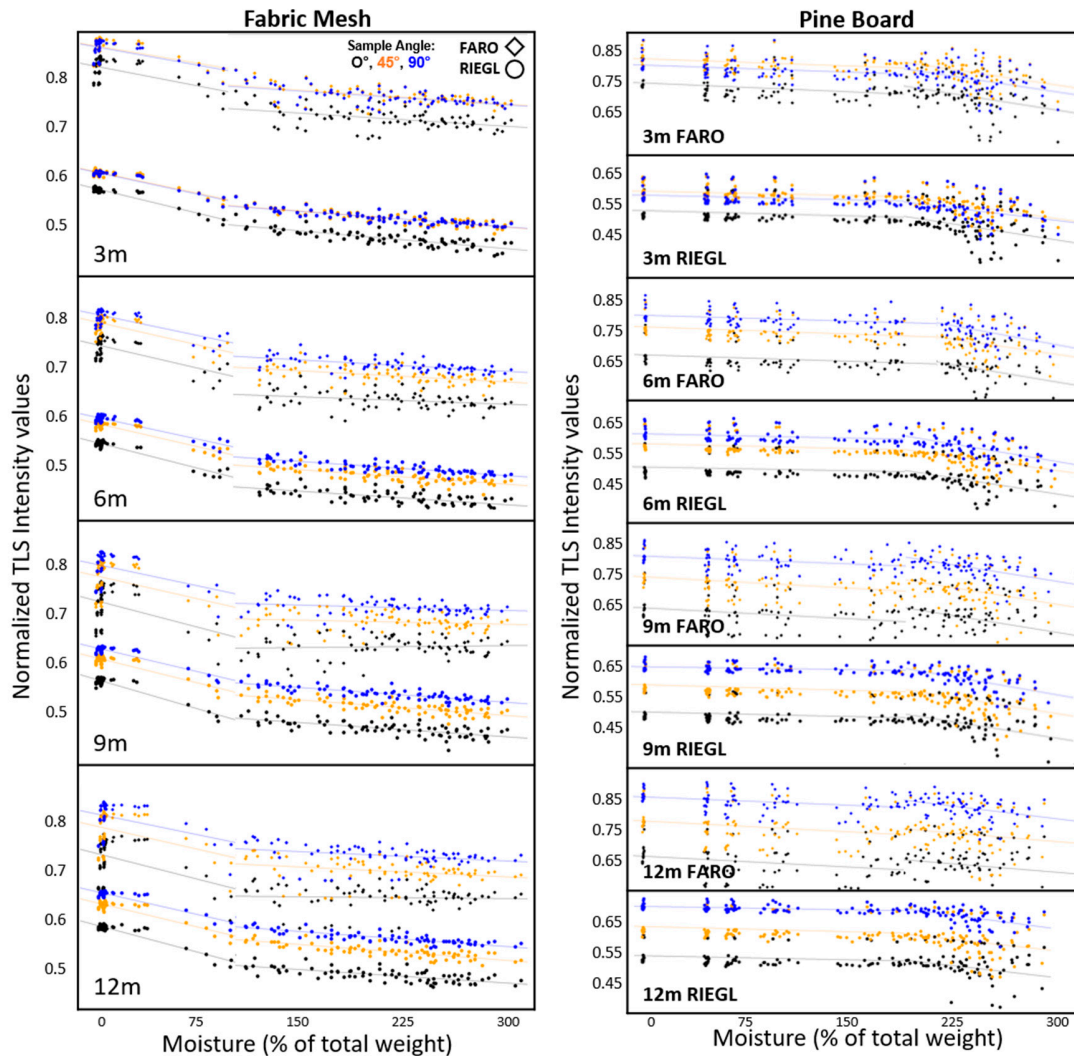

Figure S3. Scatter plot of all control samples at the three different angles relative to the ground. General data trends held for all data with the samples placed at 45° and 90° even though samples at these angles returned a greater amount of energy compared to the samples at 0°. RIEGL and FARO fabric mesh samples are plotted on the same y axis as there was a visible separation of the data, while the pine board values were separated due to a large overlap in the points.
